# Supplementary material
Source: MDPI journal article supplement (https://www.mdpi.com/2036-7503/6/1/5186)

A gap between need and reality - neonatal nursing staff requirements on a German intensive care unit (Supplementary Material)

### Supplementary Material, Part 1:

#### Indicators of quality in structures, processes and results of perinatal centres in Germany.

The QFR directive of the German Federal Joint Commission (G-BA), valid from January 1<sup>st</sup>, 2014, covers these items. Abbreviations: QM = quality management, iQM = internal QM, EsQS = external quality assurance in hospitals (inpatients), IVH/PVH = intraventricular / periventricular hemorrhagia, ROP = retinopathy of prematurity, NEC = necrotizing enterocolitis, BPD = bronchopulmonary dysplasia, ICP = infantile cerebral palsy.

| Structures                                                     |                                                                 |                     | Processes                                              | Results                                                                                                                          |
|----------------------------------------------------------------|-----------------------------------------------------------------|---------------------|--------------------------------------------------------|----------------------------------------------------------------------------------------------------------------------------------|
| Staff (by department)                                          |                                                                 | Infrastructure      | Internal QM                                            | External QM (Published)                                                                                                          |
| Obstetrics                                                     | Neonatology                                                     | Building            | Prevention of nosocomial infection                     | EsQS / Quality Report                                                                                                            |
| Attending Physician / Trainee: in house                        | Attending Physician / Trainee: in house                         | Equipment           |                                                        | Short-term:                                                                                                                      |
| Board-certified obstetrician: ≥ 1 in house /on call (hands on) | Board-certified pediatrician: ≥ 1 in house /on call (hands on)  | •Incubators         | Inter-professional clinical rounds                     | •Patient volume                                                                                                                  |
|                                                                |                                                                 | •Respirators        |                                                        | •Survival                                                                                                                        |
|                                                                |                                                                 | •Monitors           | Inter-professional morbidity and mortality conferences | •Damage-free survival, i.e. without<br>– IVH grade 3 or PVH<br>– ROP ≥ stage 3<br>– NEC ≥ stage 2<br>– BPD at hospital discharge |
| Subspecialty in perinatology: ≥ 1 on call (telephone)          | Subspecialty in neonatology: ≥ 1 on call (hands-on / telephone) | Diagnostics         |                                                        |                                                                                                                                  |
|                                                                |                                                                 | •X-ray              | Physicians and technical assistance:                   | Long-term:                                                                                                                       |
|                                                                |                                                                 | •Sonography         |                                                        |                                                                                                                                  |
| Midwives:                                                      | Nurses:                                                         | •Echocardiography   | Transitional care (inpatients and outpatients)         |                                                                                                                                  |
| ≥ 1 in house<br>≥ 1 on call (hands-on)                         | in house (defined nurse-to-patient ratio)                       | •Blood gas analysis |                                                        |                                                                                                                                  |
|                                                                |                                                                 | Transport           | Psychosocial intervention team                         |                                                                                                                                  |
| Competence in management                                       | Subspecialty in pediatric intensive care: ≥ 1 in house          | Surgery             |                                                        |                                                                                                                                  |
|                                                                | Competence in management                                        |                     |                                                        |                                                                                                                                  |

**Source:** Bundesministerium für Gesundheit. Bekanntmachung eines Beschlusses des Gemeinsamen Bundesausschusses über eine Änderung der „Vereinbarung über Maßnahmen zur Qualitätssicherung der Versorgung von Früh- und Neugeborenen“ vom 20. Juni 2013. Available at: [https://www.bundesanzeiger.de/ebanzwww/contentloader?state.action=genericsearch\\_loadpublicationpdf&session.sessionid=083efd1dd5f457c14b58d6bcd4762a22&fts\\_search\\_list.destHistoryId=94524&fts\\_search\\_list.selected=36d664e8a5e06ac2&state.filename=BAZ AT 11.11.2013 B3](https://www.bundesanzeiger.de/ebanzwww/contentloader?state.action=genericsearch_loadpublicationpdf&session.sessionid=083efd1dd5f457c14b58d6bcd4762a22&fts_search_list.destHistoryId=94524&fts_search_list.selected=36d664e8a5e06ac2&state.filename=BAZ AT 11.11.2013 B3); accessed November 19<sup>th</sup>, 2013.

## **Supplementary Material, Part 2:**

### **Case descriptions used for comparison of British Association of Perinatal Medicine (BAPM) categories of care indicator list versions 2010 and 2011**

#### **Case #1**

gestational age: 27+3 weeks, birth weight: 1050g (body weight: 935g at 6th day of life); main diagnoses: primary pulmonary hypoplasia, BPD in the course of treatment; process of respiratory support: HFO (plus iNO) → mechanical ventilation → CPAP → oxygen replacement until discharge from ICU; catecholamines 1 day after birth; no surgical procedures; ICU treatment from March 15<sup>th</sup> to April 23<sup>rd</sup>.

BAPM indicator list 2010: 14 days in category 1 (mechanical ventilation, then body weight below 1000g and receiving CPAP), 27 days in category 2 until discharge (NCPAP for any part of the day followed by oxygen replacement and body weight below 1500g until discharge);

BAPM indicator list 2011: 13 days in category 1 (mechanical ventilation, then CPAP plus parenteral nutrition), 21 days in category 2 (CPAP plus parenteral nutrition), 7 days in category 3 until discharge (oxygen replacement by nasal cannula).

#### **Case #2**

gestational age: 38+0 weeks, birth weight: 2530g; main diagnoses: VACTERL association/esophageal atresia (Vogt IIIB) → surgically treated; respiratory support only during surgery and 4 days thereafter; cardiovascular support for 5 days during anesthesia for surgery and mechanical ventilation; ICU treatment from February 10<sup>th</sup> to February 18<sup>th</sup>.

BAPM indicator list 2010: 8 days in category 1 (mechanical ventilation plus one day after withdrawal), 1 day in category 2 until discharge (parenteral nutrition);

BAPM indicator list 2011: 7 days in category 1 (mechanical ventilation), 2 days in category 2 until discharge (parenteral nutrition).

#### **Case #3**

gestational age: 26+2 weeks, birth weight: 745g; main diagnoses: RDS, ROP III°, patent ductus arteriosus (surgically closed 14 days after birth); process of respiratory support: mechanical ventilation → CPAP on trial → re-intubation and mechanical ventilation → CPAP → oxygen replacement until discharge from ICU; dopamine one day after surgery; treatment on ICU from November 3<sup>rd</sup> to January 2<sup>nd</sup>.

BAPM indicator list 2010: 33 days in category 1 (mechanical ventilation followed by CPAP and body weight below 1000g, then mechanical ventilation followed by CPAP and body weight below 1000g), 25 days in category 2 (CPAP and body weight above 1000g followed

by oxygen replacement and body weight below 1500g), 2 days in category 3 until discharge (baby could not reasonably be expected be looked after at home by its mother);

BAPM indicator list 2011: 39 days in category 1 (mechanical ventilation, then CPAP plus parenteral nutrition followed by mechanical ventilation, then CPAP plus parenteral nutrition), 16 days in category 2 (CPAP), 5 days in category 3 until discharge (oxygen replacement by nasal cannula).

#### **Case #4**

gestational age: 26+1 weeks, birth weight: 805g; main diagnoses: amnion infection syndrome, patent ductus arteriosus (closed with ibuprofen), BPD in the course of treatment; process of respiratory support: mechanical ventilation → CPAP on trial → re-intubation and mechanical ventilation → CPAP → oxygen replacement until discharge from ICU; treatment on ICU from October 21<sup>st</sup> to January 11<sup>th</sup>;

BAPM indicator list 2010: 34 days in category 1 (mechanical ventilation, then CPAP and body weight below 1000g followed by mechanical ventilation, then CPAP and body weight below 1000g), 41 days in category 2 (CPAP and body weight above 1000g), 8 days in category 3 until discharge (baby could not reasonably be expected be looked after at home by its mother);

BAPM indicator list 2011: 34 days in category 1 (mechanical ventilation, then CPAP plus parenteral nutrition followed by mechanical ventilation, then CPAP plus parenteral nutrition), 41 days in category 2 (CPAP but no parenteral nutrition), 8 days in category 3 until discharge (oxygen replacement by nasal cannula).

**Abbreviations:** BPD = bronchopulmonary dysplasia, CPAP = continuous positive airway pressure, NCPAP = nasal CPAP, HFO = high frequency oscillation, iNO = inspiratory nitrous oxide, ICU = intensive care unit, RDS = respiratory distress syndrome, ROP = retinopathy of prematurity, VACTERL = **V**ertebral anomalia, **A**nal atresia, **C**ardiac defects, **T**racheoesophageal fistula and/or **E**sophageal atresia, **R**enal anomalies and **L**imb defects.

**Figure:** Comparative analysis of 4 patients described above assessed using both the British Association of Perinatal Medicine (BAPM) 2010 and 2011 indicator lists.

#1

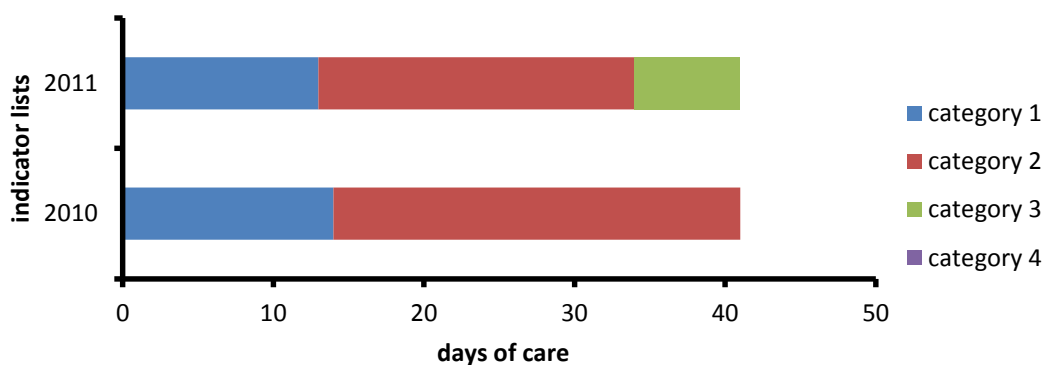

#2

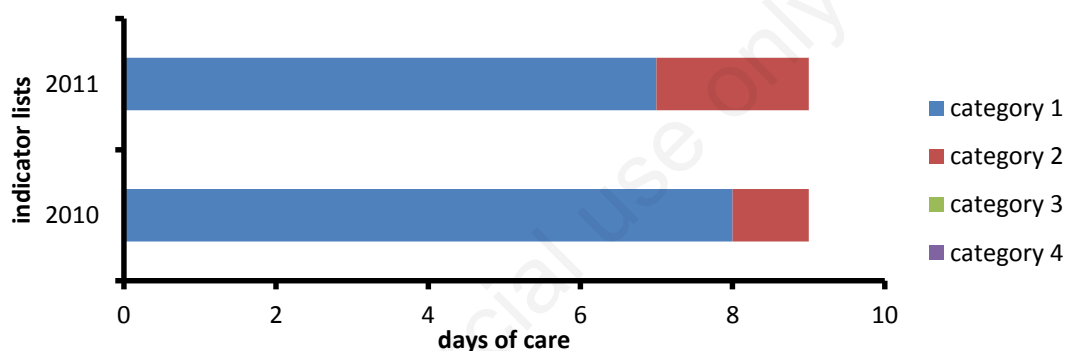

#3

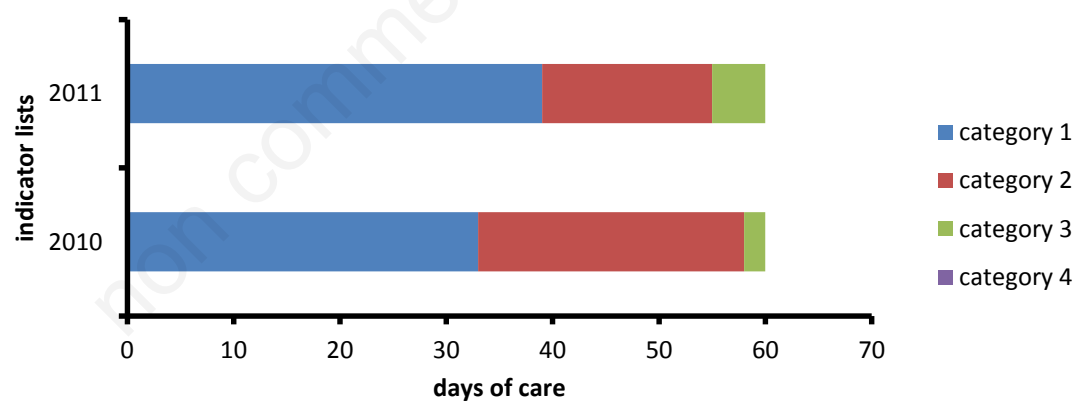

#4

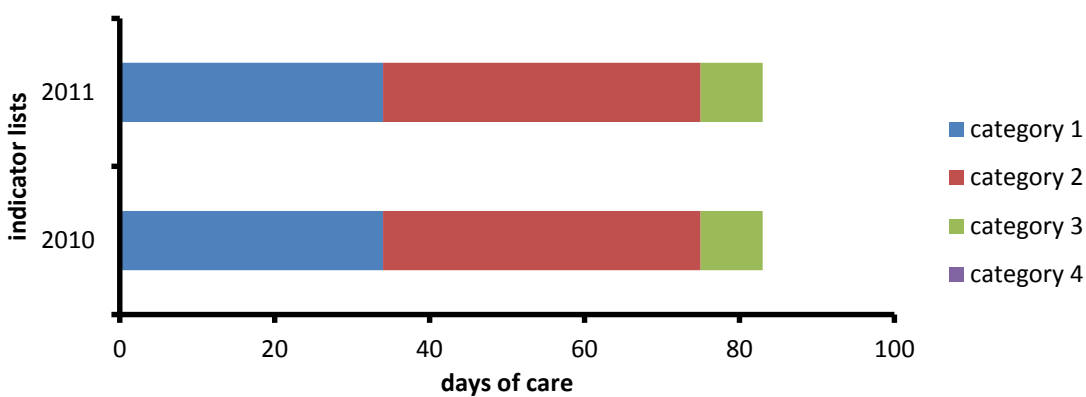

Supplement: s1 [file s1]
